# Supplementary material for: Dynamic mechanisms of CRISPR interference by Escherichia coli CRISPR-Cas3
Source: PubMed Central journal article supplement (PMC9427990; doi:10.1038/s41467-022-32618-0), 2022-08-30
Supplement: 41467_2022_32618_MOESM1_ESM.pdf [file 41467_2022_32618_MOESM1_ESM.pdf]

**a**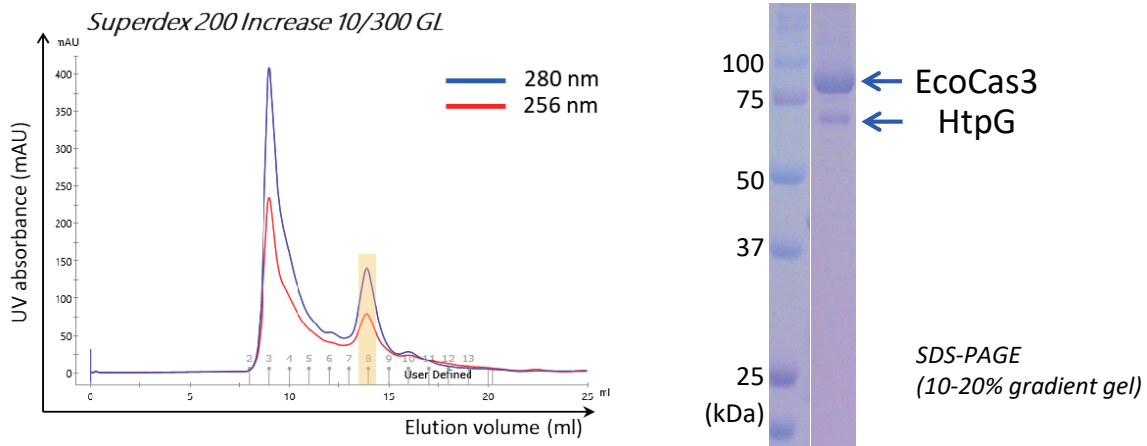**b**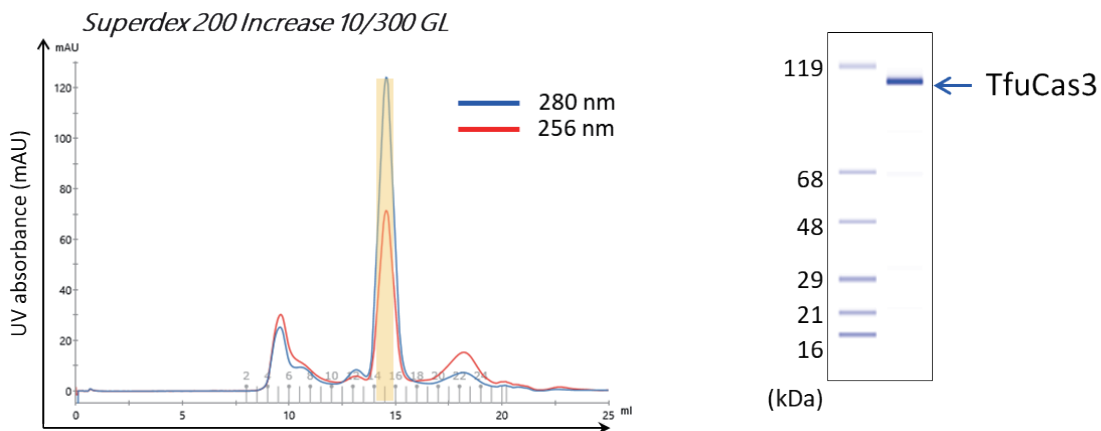

**Supplementary Fig. 1. Purification of EcoCas3 and TfuCas3 recombinant proteins by the *E. coli* bacterial expression system.** (a) A limited amount of highly aggregated *E. coli* Cas3 (EcoCas3) protein was purified by size-exclusion chromatography and was evaluated by sodium dodecyl sulfate-polyacrylamide gel electrophoresis (SDS-PAGE). Co-expression of HtpG chaperon and low temperature 20°C culture were used in the *E. coli* expression system. (b) Isolation of large amounts of *Thermobifida fusca* Cas3 (TfuCas3) protein at 37°C. This purification was repeated twice independently with similar results.

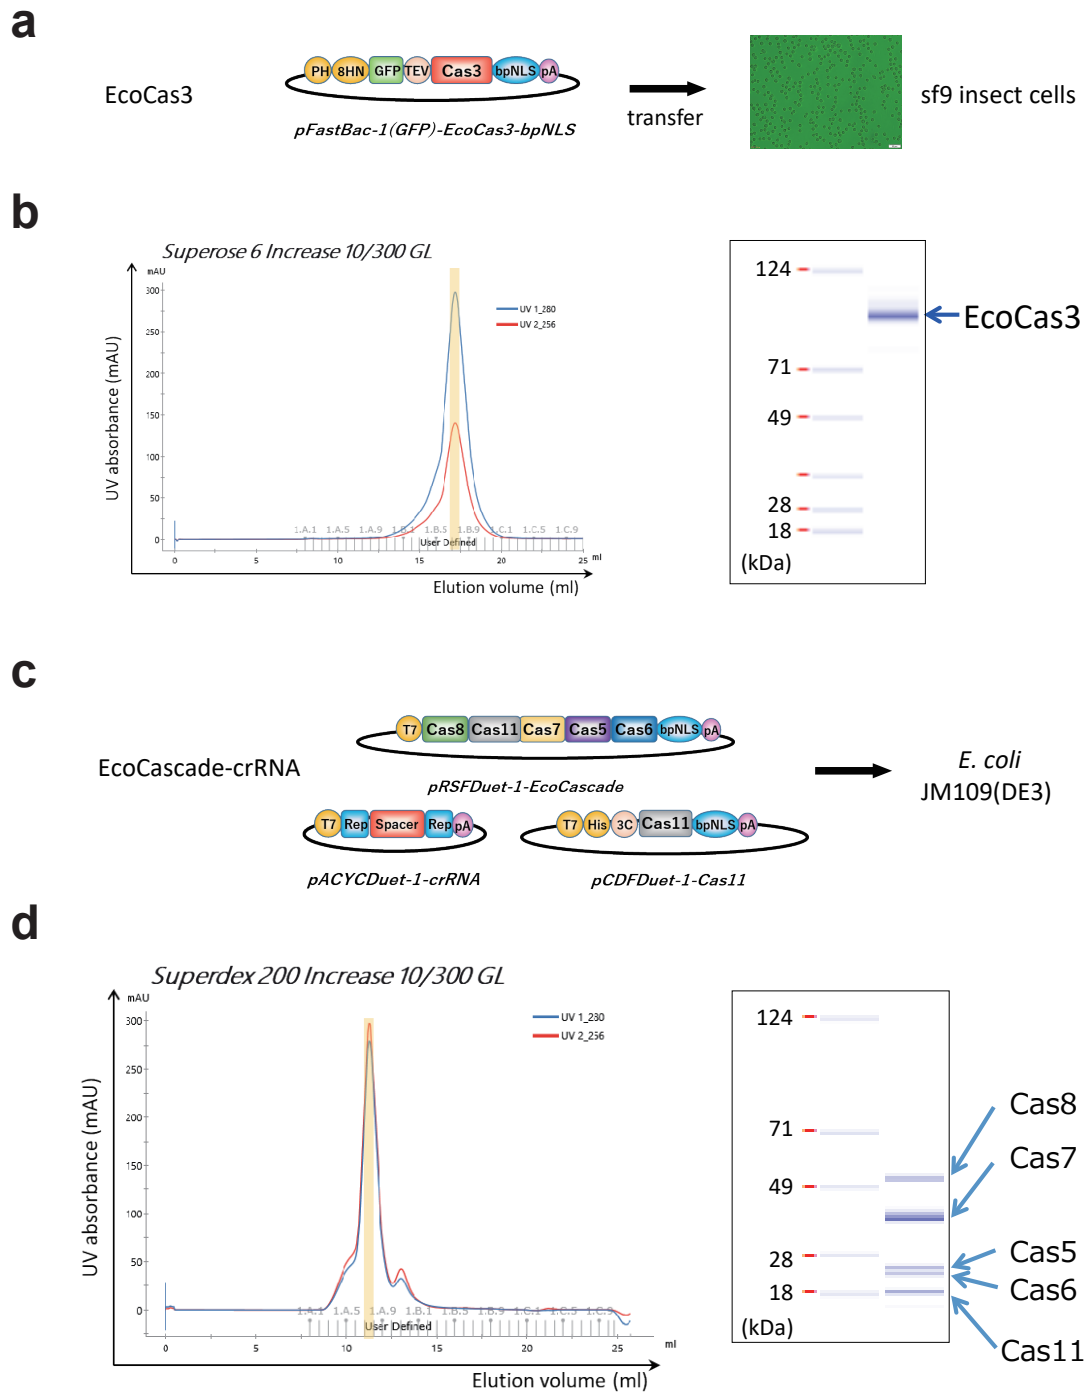

**Supplementary Fig. 2. Purification of EcoCas3 and EcoCascade (Cas5, Cas6, Cas7, Cas8, and Cas11) ribonucleoproteins.** (a) A large amount of EcoCas3 protein was purified using a baculovirus expression system in Sf9 insect cells cultured at 28°C. (b) Purified EcoCas3 protein from Sf9 cells was soluble and ~95% homogeneous on SDS-PAGE. (c,d) A complex of Cas5, Cas6, Cas7, Cas8, and Cas11 proteins and crRNA was co-expressed in JM109(DE3) *E. coli* cultured at 37°C, purified using Ni-NTA resin, and separated by size exclusion chromatography (SEC). These experiments were repeated three times independently with almost same results.

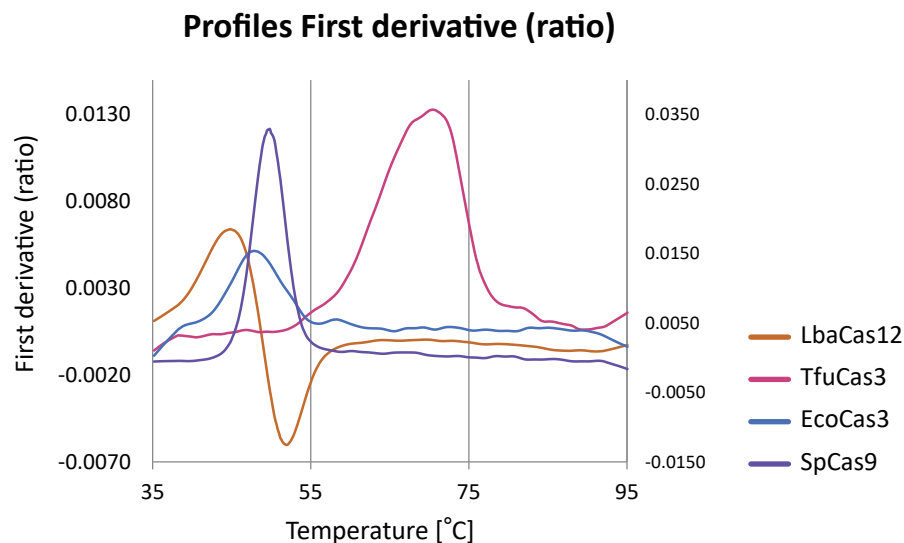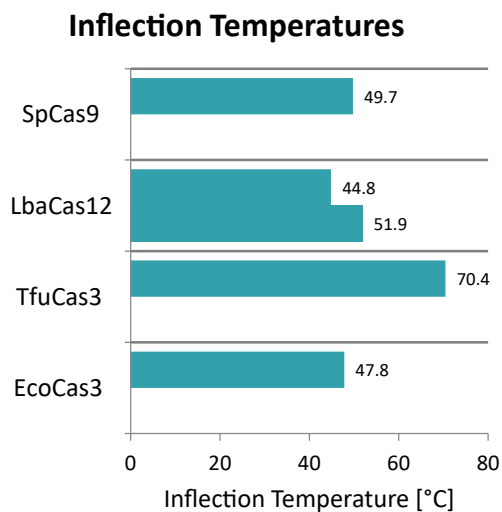

**Supplementary Fig. 3. Temperature-dependent stability of recombinant EcoCas3 protein.** To evaluate the temperature-dependent stability of purified EcoCas3, we employed a modified nanoscale differential scanning fluorimetry method, nanoDSF, which determines protein stability by measuring intrinsic tryptophan or tyrosine fluorescence using the Tycho NT.6 system (NanoTemper Technologies GmbH). The profiles show the first derivative ratio of 330 and 350 nm as the temperature rises from 35°C to 95°C. EcoCas3 protein purified from Sf9 cells had a temperature inflection point (Ti) of 47.8°C, while TfuCas3 and off-the-shelf SpCas9 proteins had Ti's of 70.4°C and 49.7°C, respectively. LbaCas12a protein had two Tis (44.8 and 51.9°C), which may represent dimeric structural dissociation between the REC and NUC lobes.

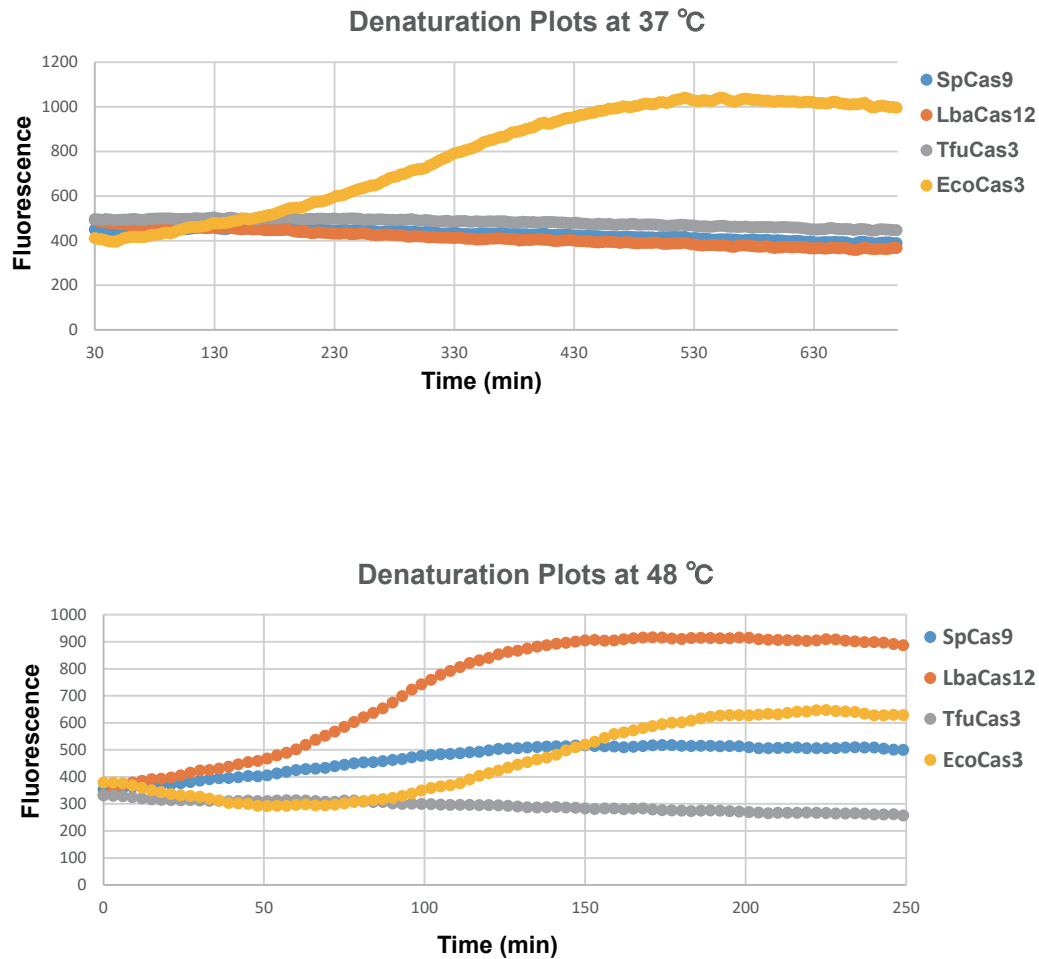

**Supplementary Fig. 4. Temperature-dependent stability of recombinant EcoCas3 protein.** We evaluated temperature-dependent stability using ProteoStat detection reagent (Enzo Life Sciences), which allowed the aggregation onset temperature to be determined. Vertical and horizontal axes show fluorescence intensity, which is dependent on protein denaturation, and time, respectively. Considering thermal stability at a constant temperature of 37°C, EcoCas3 was mostly denatured in 8 h, while SpCas9, LbaCas12, and TfuCas3 were not denatured after 24 h (upper). At a constant temperature of 48°C, LbaCas12a and SpCas9 proteins showed earlier aggregation onset than EcoCas3 (lower).

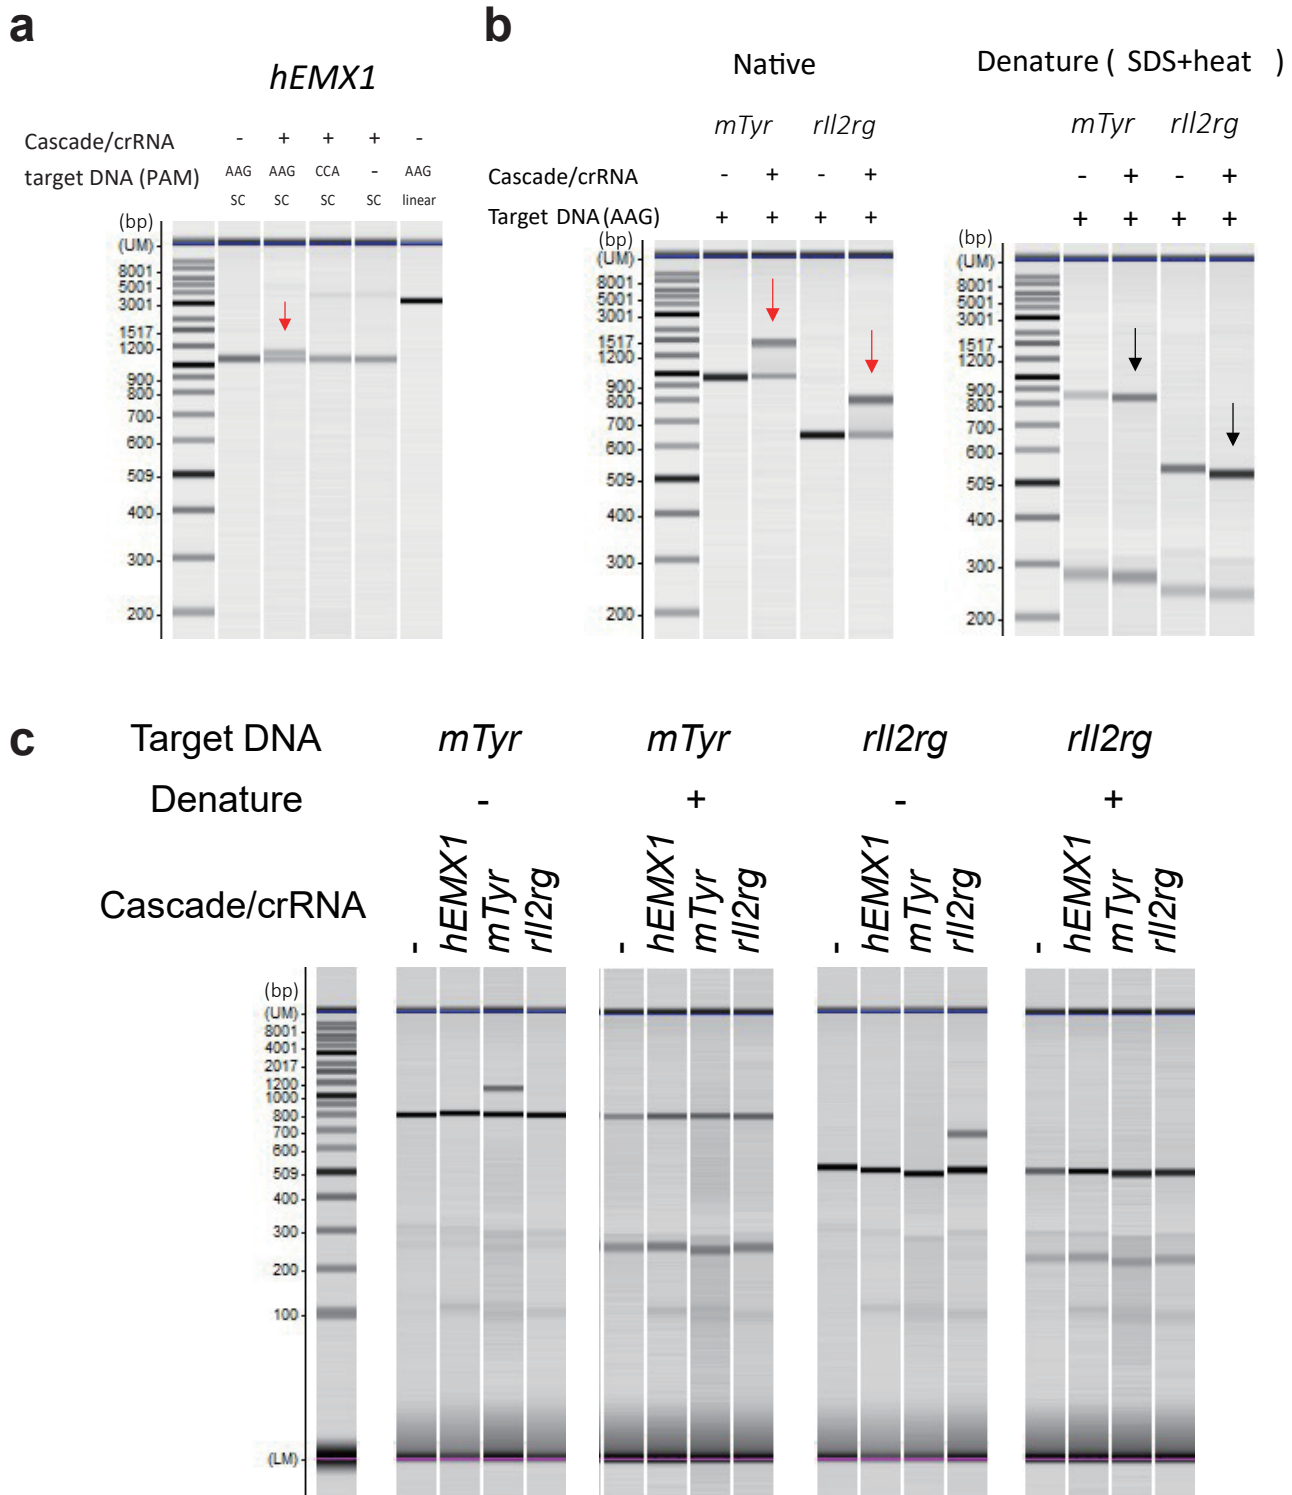

**Supplementary Fig. 5. Evaluation of R-loop formation by electrophoretic mobility shift assay (EMSAs).** (a) EcoCascade/crRNA complex binds to supercoiled (SC) plasmids containing *hEMX1* spacer sequences flanked by a PAM (AAG) as shown by a red arrow, but did not bind to a nonPAM (CCA). (b) The Cascade complex binding to the PCR products of other target sequences (*mTyr* and *rll2rg* genes). Denaturation of the Cascade complex (0.08% SDS, 95°C, 2 min) abolished DNA binding (black arrows). (c) Exchange of nucleotide pairs between crRNAs and target sequences abolished the binding, indicating the specificity of target recognition by the EcoCascade/crRNA complex. These experiments are reproducible as they showed similar results with different targeted locus.

**a**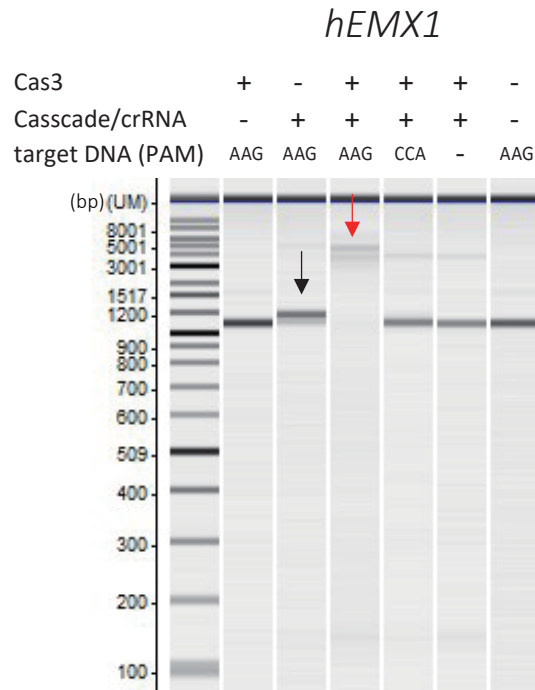**b**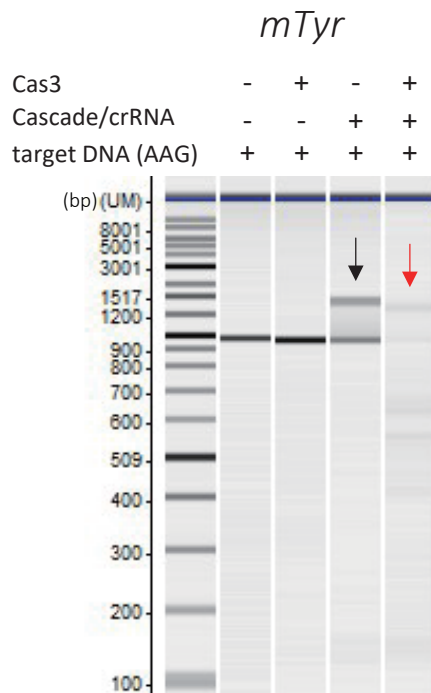

**Supplementary Fig. 6. Electrophoretic mobility shift assay (EMSA) and DNA degradation assay.** (a) EcoCascade/crRNA complex binds to target plasmids containing *hEMX1* spacer sequences flanked by PAM (AAG) (black arrow). EcoCas3 recruited into EcoCascade degrades the target DNA (red arrow). (b) EcoCascade binds to PCR products of the target DNA (*mTyr*) (black arrow), which is degraded by EcoCas3 (red arrow). This experiment is reproducible as a and b showed similar results with different targeted locus.

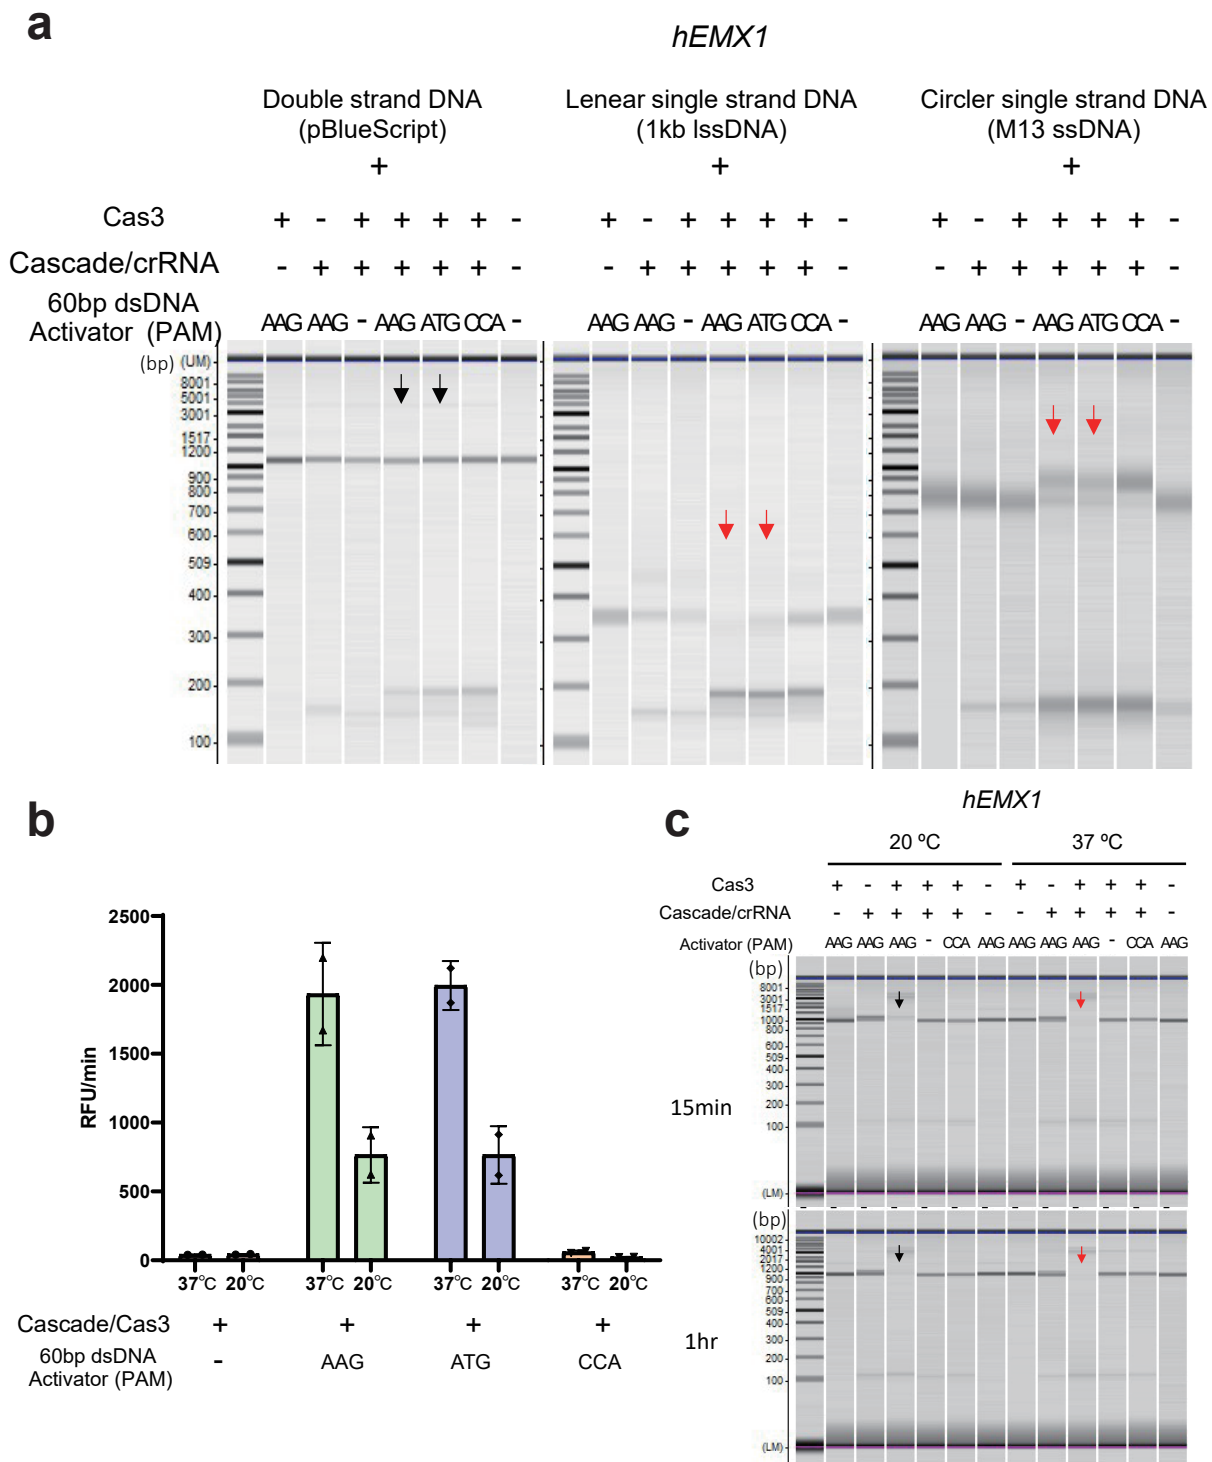

**Supplementary Fig. 7. Collateral cleavages of nearby non-specific ssDNAs.** (a) EcoCas3 possesses collateral non-specific single-stranded DNA (ssDNA) cleavage activity after target-specific double-stranded DNA (dsDNA) cleavage. Circular ssDNA M13 phage and linearized long ssDNA were degraded after incubation for 1 h at 37°C (red arrows), but circular pBlueScript dsDNA was not cleaved (black arrows). (b) Comparison of collateral cleavage activity between 37°C and 20°C. (c) *In vitro* reconstitution assay for target DNA degradation also showed higher activity at 37°C (red arrows) than at 20°C (black arrows). This experiment was repeated twice independently with similar results. Data are presented for n=2 independent measurements and mean value, error bars represent SD values.

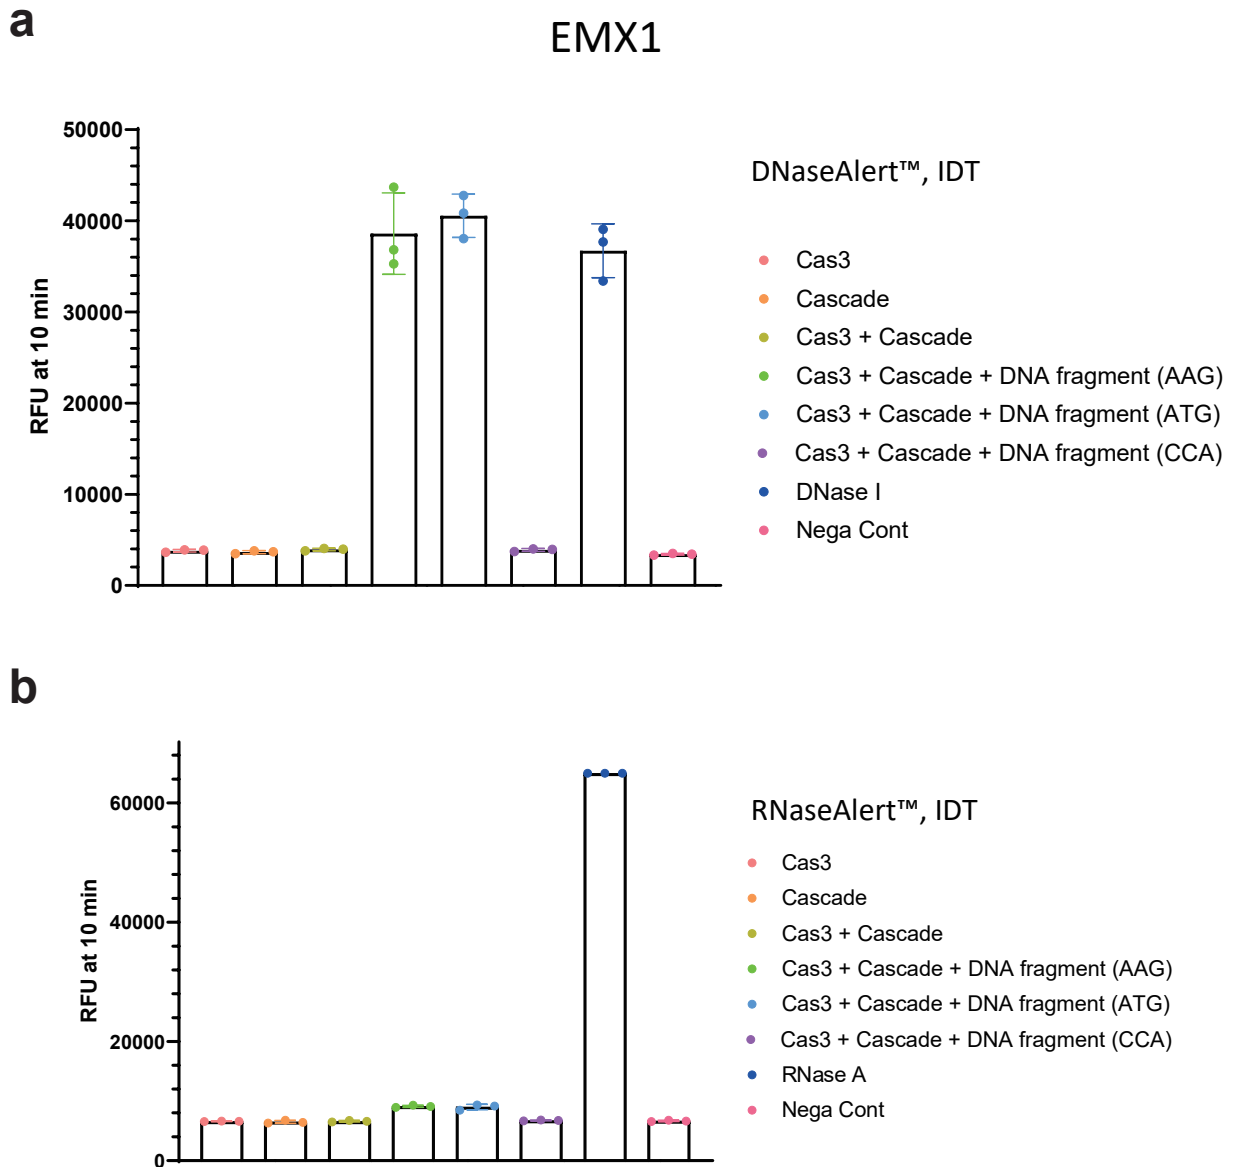

**Supplementary Fig. 8. Collateral cleavage activity for ssDNAs and ssRNAs.** (a) Using fluorescent reporter DNA oligonucleotides (DNaseAlert™, IDT), we detected collateral ssDNA cleavage activity by assembling EcoCas3, EcoCascade RNPs and dsDNA fragments that included target sequences (*hEMX1* or *mTyr*) flanked by PAM-AAG or -ATG, but not with PAM-CCA. (b) Little or no RNase activity was detected with fluorescent reporter RNA oligonucleotides (RNaseAlert™, IDT) by assembling EcoCas3, EcoCascade RNPs and dsDNA fragments. Data are presented for n=3 independent measurements and mean value, error bars represent SD values.





**a**

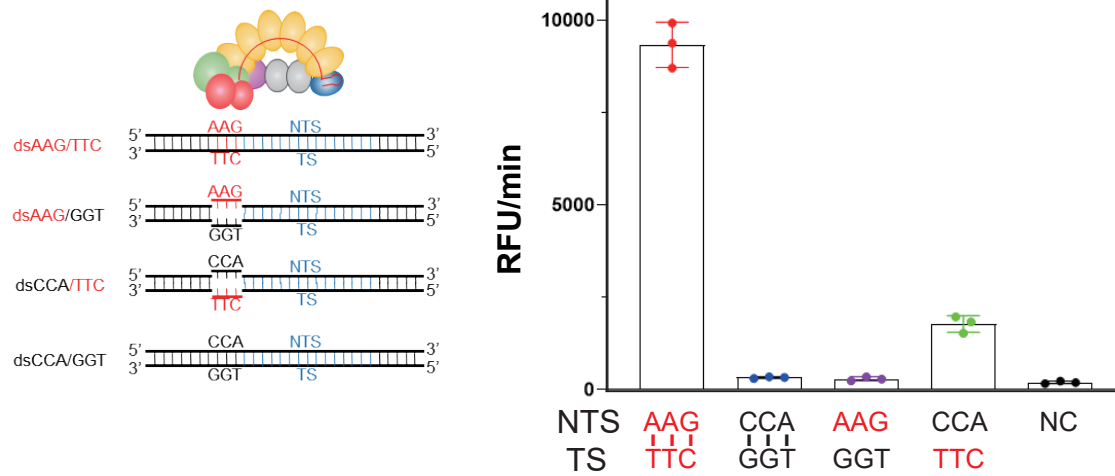

**b**

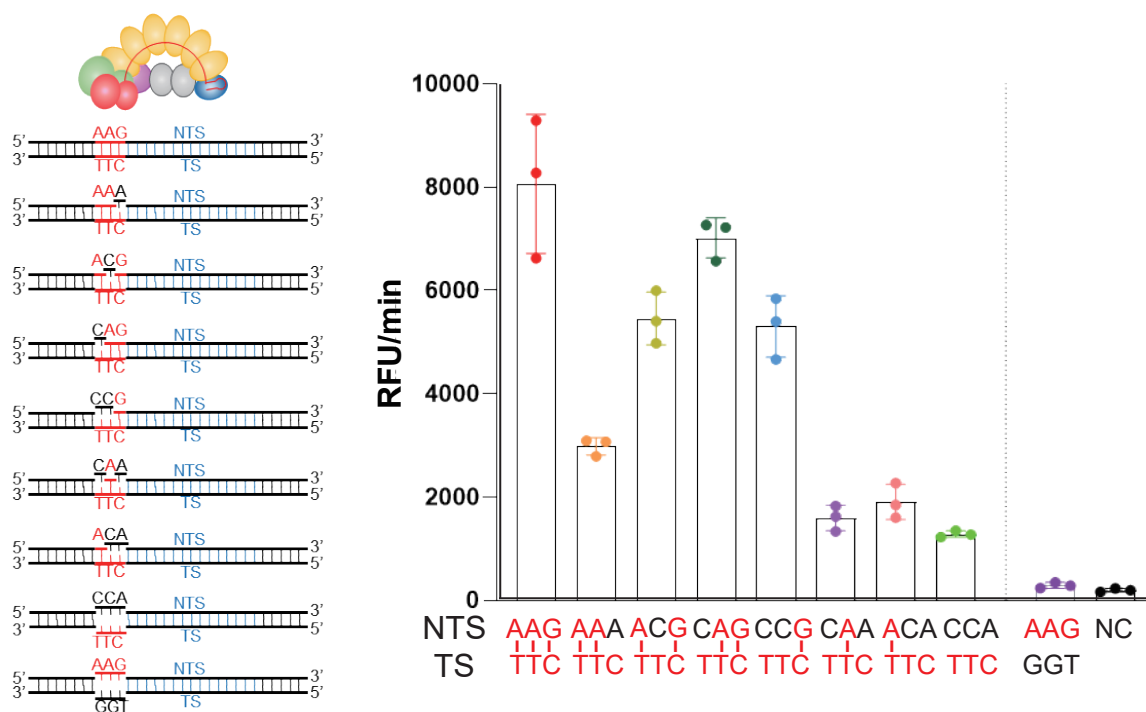

**Supplementary Fig. 10. Collateral cleavage activity.** (a) Collateral cleavage activated by dsDNA containing an unpaired PAM. (b) Screening of PAM base-pairing between every three PAM nucleotides for trans cleavage activity. Data are presented for n=3 independent measurements and mean value, error bars represent SD values.

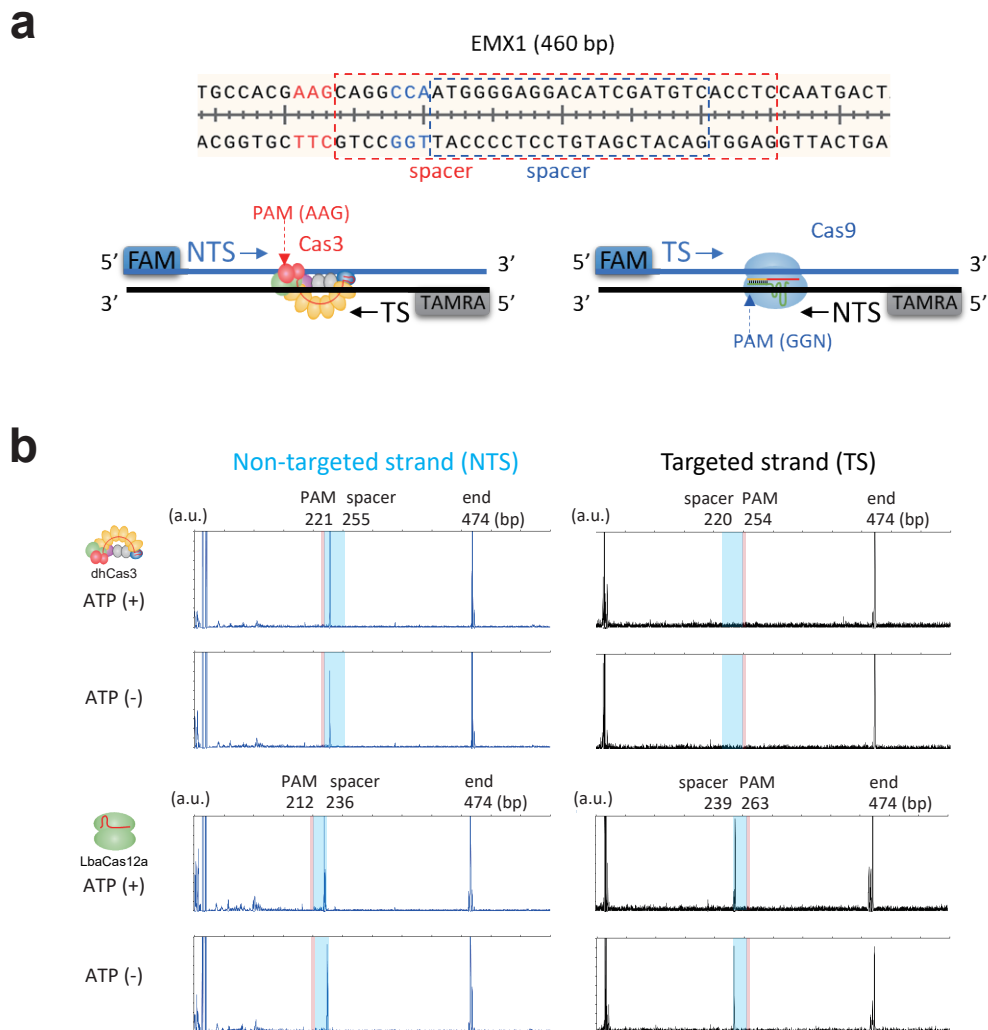

**Supplementary Fig. 11. The dsDNA cleavage assay.** (a) Schematic depictions of the dsDNA cleavage assay. Fluorescently-labeled target dsDNA substrates, 5'-NTS-FAM and 5'-TS-TAMRA, to visualize dsDNA cleavage. (b) The dhCas3 SF2 domain mutant cleaves the NTS in *cis*, but not the TS in *trans* in ATP (+ and -) reaction buffer, while LbaCas12a cleaves both the NTS and TS in ATP (+ and -) reaction buffer. The x-axis represents the DNA fragment size in base pairs (bp), and the y-axis represents the arbitrary unit (a.u.).

**a**

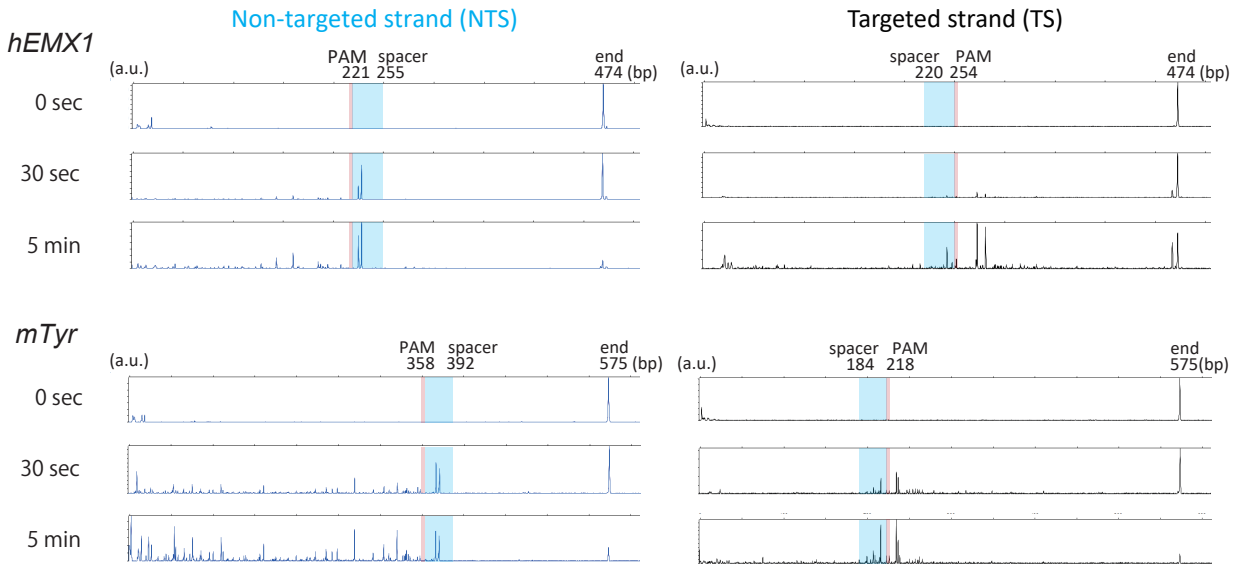

**b**

| Sample File Name       | Dye | Sample Peak | Size  | Height |
|------------------------|-----|-------------|-------|--------|
| EMX1-Cas3 37-30sec.fsa | B   | 29          | 143.2 | 482    |
| EMX1-Cas3 37-30sec.fsa | B   | 31          | 159.7 | 661    |
| EMX1-Cas3 37-30sec.fsa | B   | 42          | 224.9 | 2391   |
| EMX1-Cas3 37-30sec.fsa | B   | 43          | 228.0 | 6101   |
| EMX1-Cas3 37-30sec.fsa | B   | 45          | 468.8 | 8146   |
| EMX1-Cas3 37-30sec.fsa | Y   | 67          | 272.3 | 1103   |
| EMX1-Cas3 37-30sec.fsa | Y   | 70          | 280.6 | 700    |
| EMX1-Cas3 37-30sec.fsa | Y   | 130         | 467.0 | 1464   |
| EMX1-Cas3 37-30sec.fsa | Y   | 133         | 472.3 | 8801   |
| EMX1-Cas3 37-5min.fsa  | B   | 33          | 143.1 | 810    |
| EMX1-Cas3 37-5min.fsa  | B   | 35          | 159.7 | 1172   |
| EMX1-Cas3 37-5min.fsa  | B   | 39          | 184.8 | 519    |
| EMX1-Cas3 37-5min.fsa  | B   | 51          | 225.1 | 2510   |
| EMX1-Cas3 37-5min.fsa  | B   | 52          | 228.1 | 3525   |
| EMX1-Cas3 37-5min.fsa  | B   | 57          | 468.9 | 619    |
| EMX1-Cas3 37-5min.fsa  | Y   | 16          | 20.5  | 728    |
| EMX1-Cas3 37-5min.fsa  | Y   | 87          | 242.2 | 1145   |
| EMX1-Cas3 37-5min.fsa  | Y   | 92          | 251.6 | 527    |
| EMX1-Cas3 37-5min.fsa  | Y   | 101         | 271.3 | 491    |
| EMX1-Cas3 37-5min.fsa  | Y   | 102         | 272.4 | 2415   |
| EMX1-Cas3 37-5min.fsa  | Y   | 106         | 280.8 | 2203   |
| EMX1-Cas3 37-5min.fsa  | Y   | 167         | 467.0 | 1393   |
| EMX1-Cas3 37-5min.fsa  | Y   | 170         | 472.4 | 1901   |
| EMX1-Cas9 37-5min.fsa  | B   | 6           | 229.2 | 15251  |
| EMX1-Cas9 37-5min.fsa  | B   | 9           | 468.9 | 10292  |
| EMX1-Cas9 37-5min.fsa  | Y   | 55          | 229.0 | 593    |
| EMX1-Cas9 37-5min.fsa  | Y   | 57          | 236.2 | 583    |
| EMX1-Cas9 37-5min.fsa  | Y   | 58          | 237.0 | 1500   |
| EMX1-Cas9 37-5min.fsa  | Y   | 59          | 238.0 | 7933   |
| EMX1-Cas9 37-5min.fsa  | Y   | 109         | 468.8 | 472    |
| EMX1-Cas9 37-5min.fsa  | Y   | 110         | 472.4 | 9178   |
| EMX1-control.fsa       | B   | 8           | 469.0 | 4667   |
| EMX1-control.fsa       | Y   | 118         | 472.5 | 5050   |
| Tyr-Cas3 37-30sec.fsa  | B   | 16          | 52.5  | 401    |
| Tyr-Cas3 37-30sec.fsa  | B   | 22          | 75.0  | 401    |
| Tyr-Cas3 37-30sec.fsa  | B   | 28          | 109.4 | 406    |
| Tyr-Cas3 37-30sec.fsa  | B   | 56          | 269.1 | 699    |
| Tyr-Cas3 37-30sec.fsa  | B   | 63          | 320.2 | 487    |
| Tyr-Cas3 37-30sec.fsa  | B   | 75          | 366.3 | 1410   |
| Tyr-Cas3 37-30sec.fsa  | B   | 77          | 370.5 | 1148   |
| Tyr-Cas3 37-30sec.fsa  | B   | 79          | 573.3 | 2171   |
| Tyr-Cas3 37-30sec.fsa  | Y   | 83          | 215.7 | 914    |
| Tyr-Cas3 37-30sec.fsa  | Y   | 91          | 234.2 | 1258   |
| Tyr-Cas3 37-30sec.fsa  | Y   | 204         | 573.2 | 2608   |
| Tyr-Cas3 37-5min.fsa   | B   | 14          | 53.5  | 610    |
| Tyr-Cas3 37-5min.fsa   | B   | 20          | 74.4  | 447    |
| Tyr-Cas3 37-5min.fsa   | B   | 21          | 75.2  | 544    |
| Tyr-Cas3 37-5min.fsa   | B   | 29          | 109.4 | 536    |
| Tyr-Cas3 37-5min.fsa   | B   | 53          | 269.0 | 585    |
| Tyr-Cas3 37-5min.fsa   | B   | 61          | 320.2 | 436    |
| Tyr-Cas3 37-5min.fsa   | B   | 70          | 366.3 | 456    |
| Tyr-Cas3 37-5min.fsa   | Y   | 85          | 215.6 | 1099   |
| Tyr-Cas3 37-5min.fsa   | Y   | 93          | 234.3 | 987    |
| Tyr-Cas3 37-5min.fsa   | Y   | 94          | 236.4 | 514    |
| Tyr-Cas3 37-5min+h.fsa | B   | 8           | 22.6  | 609    |
| Tyr-Cas3 37-5min+h.fsa | B   | 9           | 25.9  | 408    |
| Tyr-Cas3 37-5min+h.fsa | B   | 16          | 53.6  | 873    |
| Tyr-Cas3 37-5min+h.fsa | B   | 23          | 75.1  | 594    |
| Tyr-Cas3 37-5min+h.fsa | B   | 31          | 109.5 | 592    |
| Tyr-Cas3 37-5min+h.fsa | B   | 41          | 160.4 | 425    |
| Tyr-Cas3 37-5min+h.fsa | B   | 60          | 269.1 | 806    |
| Tyr-Cas3 37-5min+h.fsa | B   | 65          | 304.2 | 424    |
| Tyr-Cas3 37-5min+h.fsa | B   | 70          | 320.1 | 780    |
| Tyr-Cas3 37-5min+h.fsa | B   | 82          | 366.3 | 754    |
| Tyr-Cas3 37-5min+h.fsa | B   | 84          | 370.5 | 631    |
| Tyr-Cas3 37-5min+h.fsa | Y   | 78          | 206.7 | 624    |
| Tyr-Cas3 37-5min+h.fsa | Y   | 79          | 208.8 | 403    |
| Tyr-Cas3 37-5min+h.fsa | Y   | 84          | 215.6 | 1898   |
| Tyr-Cas3 37-5min+h.fsa | Y   | 94          | 234.3 | 2154   |
| Tyr-Cas3 37-5min+h.fsa | Y   | 95          | 236.4 | 1147   |
| Tyr-Cas3 37-5min+h.fsa | Y   | 96          | 238.4 | 417    |
| Tyr-Cas3 37-5min+h.fsa | Y   | 183         | 573.1 | 486    |
| Tyr-control.fsa        | B   | 7           | 573.3 | 3493   |
| Tyr-control.fsa        | Y   | 148         | 573.2 | 3565   |

**Supplementary Fig. 12. The dsDNA cleavage assay.** (a) Comparison of 30 sec (short) and 5 min (long) incubation for the dsDNA cleavage assay (*hEMX1* or *mTyr*). The x-axis represents the DNA fragment size in base pairs (bp), and the y-axis represents the arbitrary unit (a.u.). (b) The size and patterns of cleaved fragments after short and long incubation in the dsDNA cleavage assay.

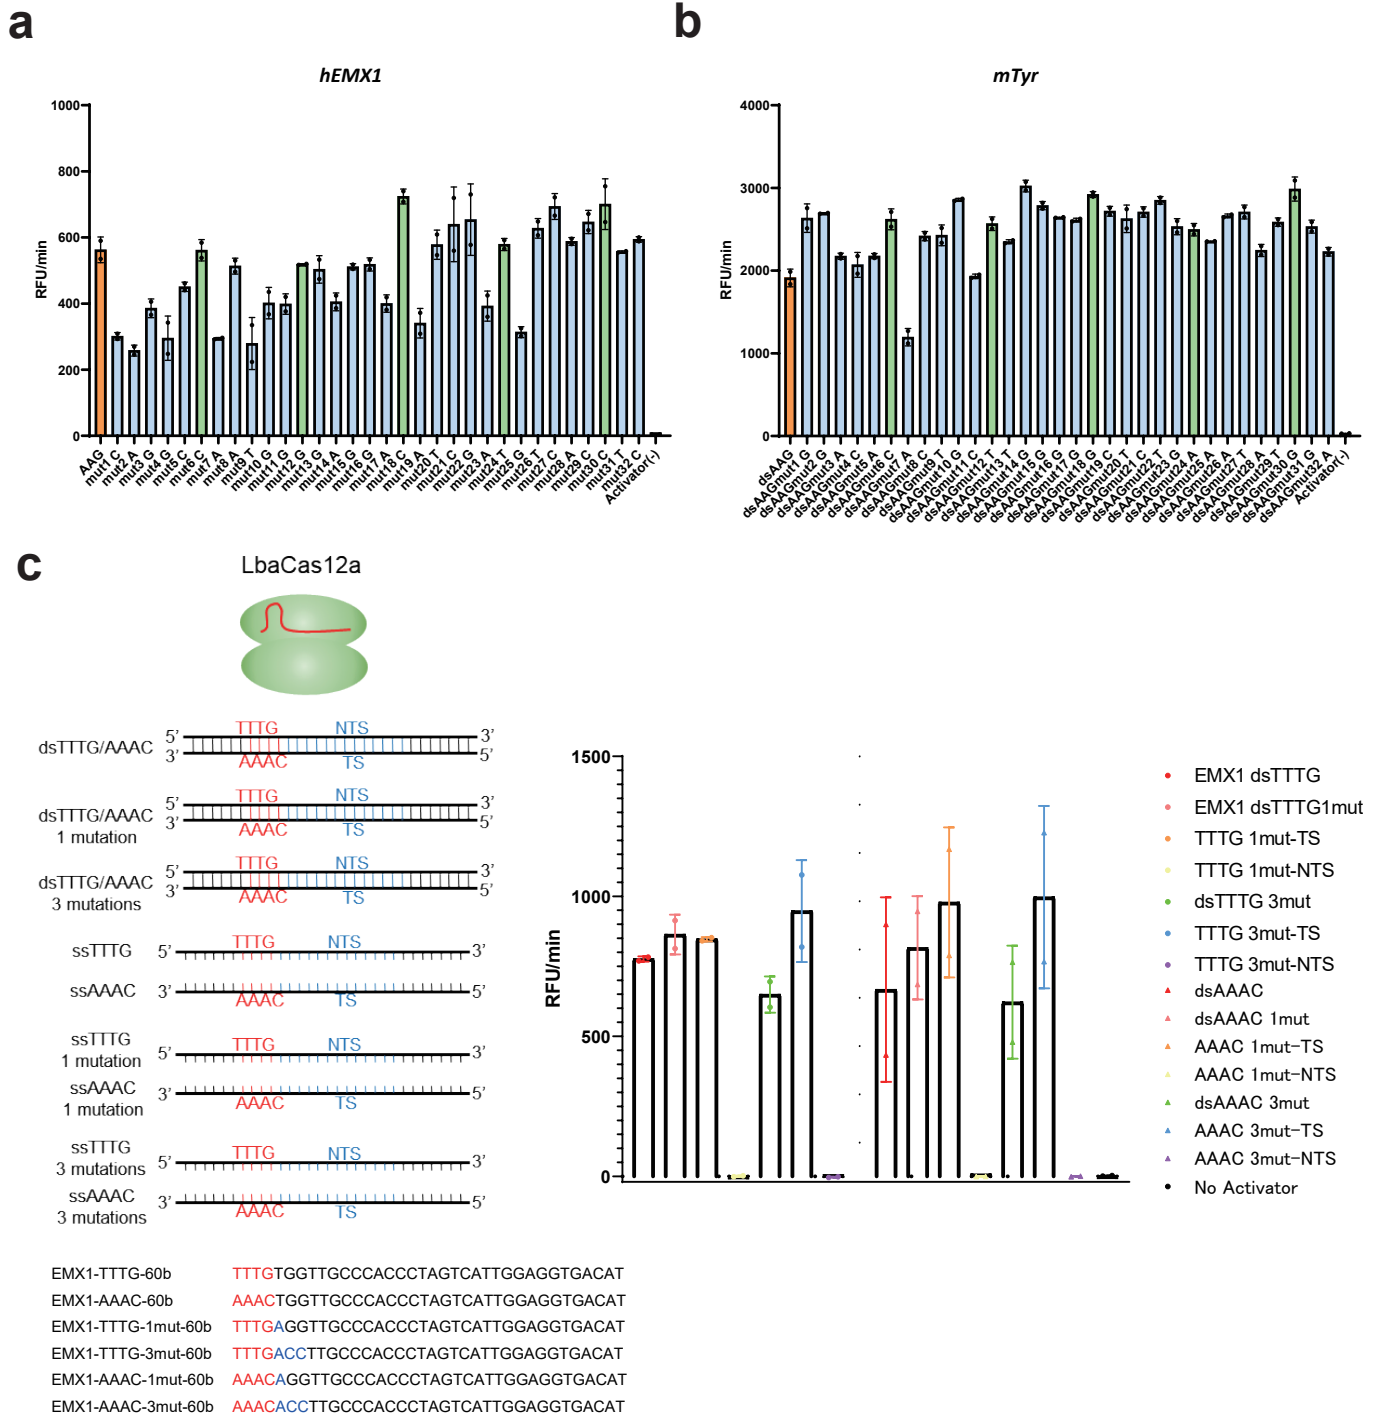

**Supplementary Fig. 13. The effect of mismatch of each 32-nt spacer sequence on collateral cleavage activity.** (a,b) A single mismatch in the spacer region has a little or no effect on collateral cleavage activity of *hEMX1* target (a) and *mTyr* target (b). (c) One to three mismatches in the PAM sites and the spacer region have little effect on collateral cleavage activity by LbaCas12a. Data are presented for n=2 independent measurements and mean value, error bars represent SD values.

**a**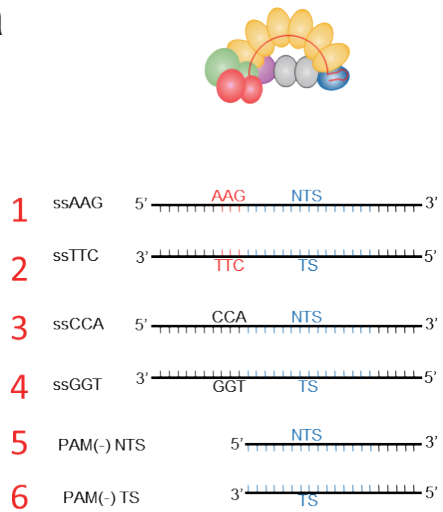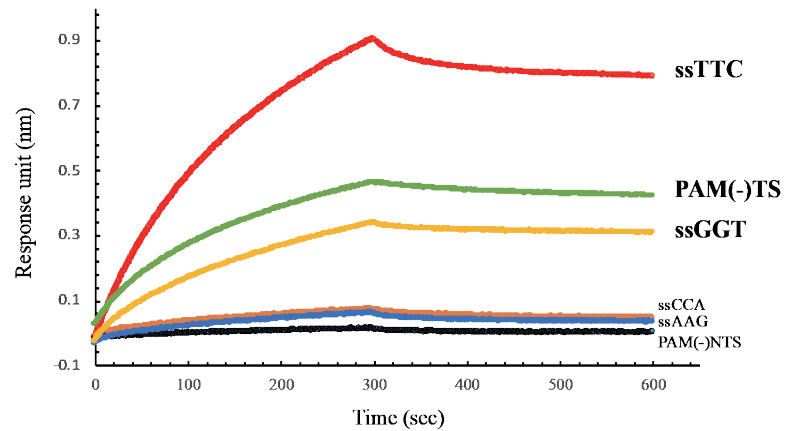**b**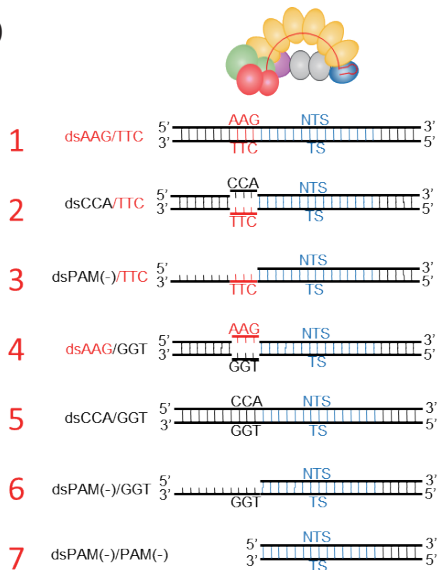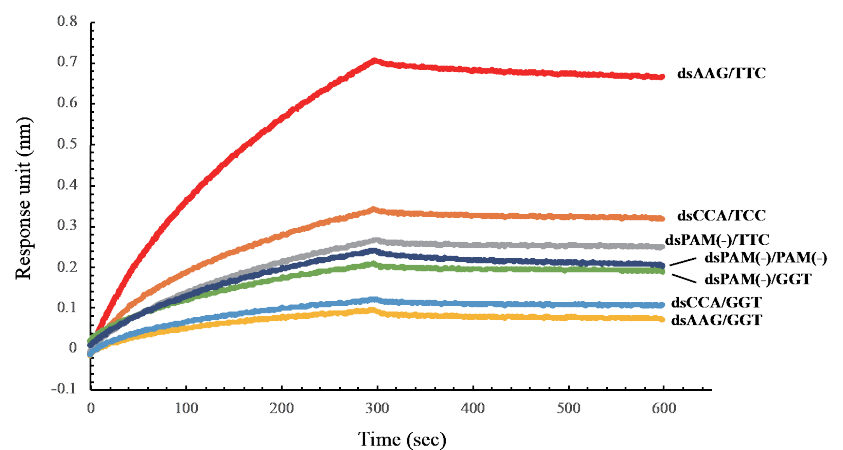

**Supplementary Fig. 14. EcoCascade-target DNA associations and dissociations measured by the Octet RED 96 System.** (a) crRNA-complementary ssDNA with TS-PAM (TTC) showing collateral cleavage (Fig. 2c) represents higher association than TS-nonPAM or TS-PAMless. (b) The interactions between Cascade and dsDNAs containing paired PAM (AAG-TTC), unpaired PAM between TS-PAM (TTC) and NTS-nonPAM (CCA), and unpaired PAM between NTS-PAM (AAG) and TS-nonPAM (GGT), correspond with the results from the collateral cleavage assay (Fig. 2f).

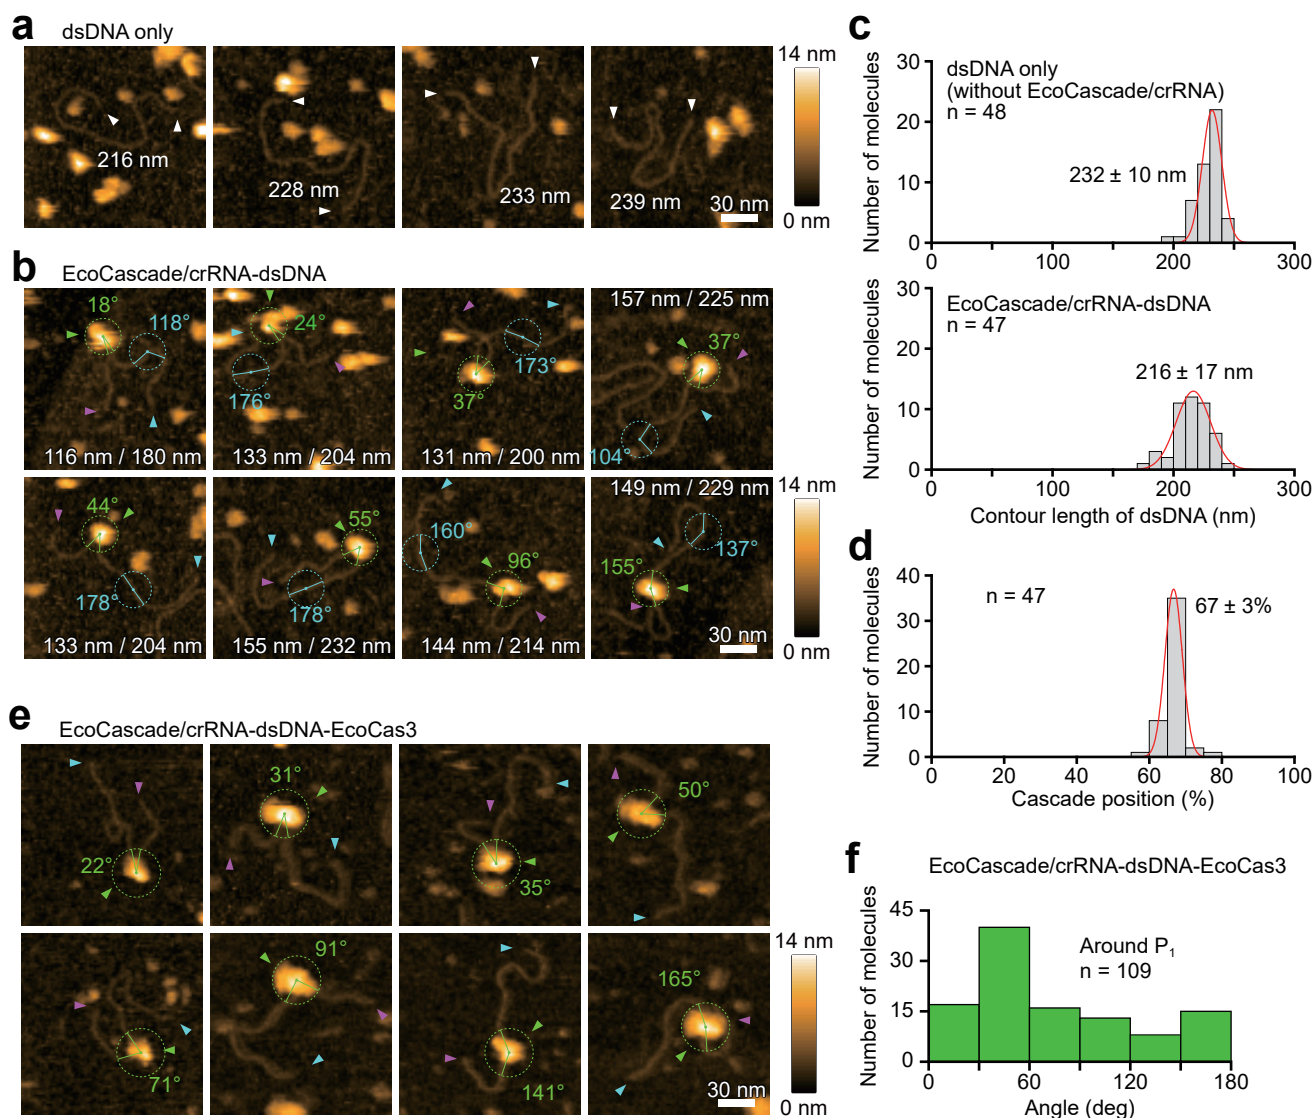

**Supplementary Fig. 15. Quantitative characterization of Cascade-DNA binding.** (a) Typical images of DNA without Cascade. Measured DNA length indicated by white letters. DNA ends: white arrowheads. Scan area:  $150 \times 150 \text{ nm}^2$  with  $80 \times 80$  pixels; frame time: 0.2 s (line rate: 400 Hz). (b) Typical images of EcoCascade-dsDNA bindings. The short DNA from the cascade: magenta arrowheads, The long DNA from the cascade: light blue arrowheads. Cascade binding site: green arrowheads. Measured DNA length indicated by white letters. The angle of the DNA with and without Cascade is also shown in green and blue, respectively. (c) Histograms of DNA length with Cascade (bottom) and without Cascade (top). Mean  $\pm$  S.D. (d) Histogram of the ratio of the length of long DNA to total length. Mean  $\pm$  S.D. (e) Typical images of EcoCas3-EcoCascade-dsDNA complexes. R:20 nm. (f) Histograms of DNA angles around P<sub>1</sub> in EcoCas3-EcoCascade-dsDNA. The each experiments in a, b, e were repeated twice independently with similar results.

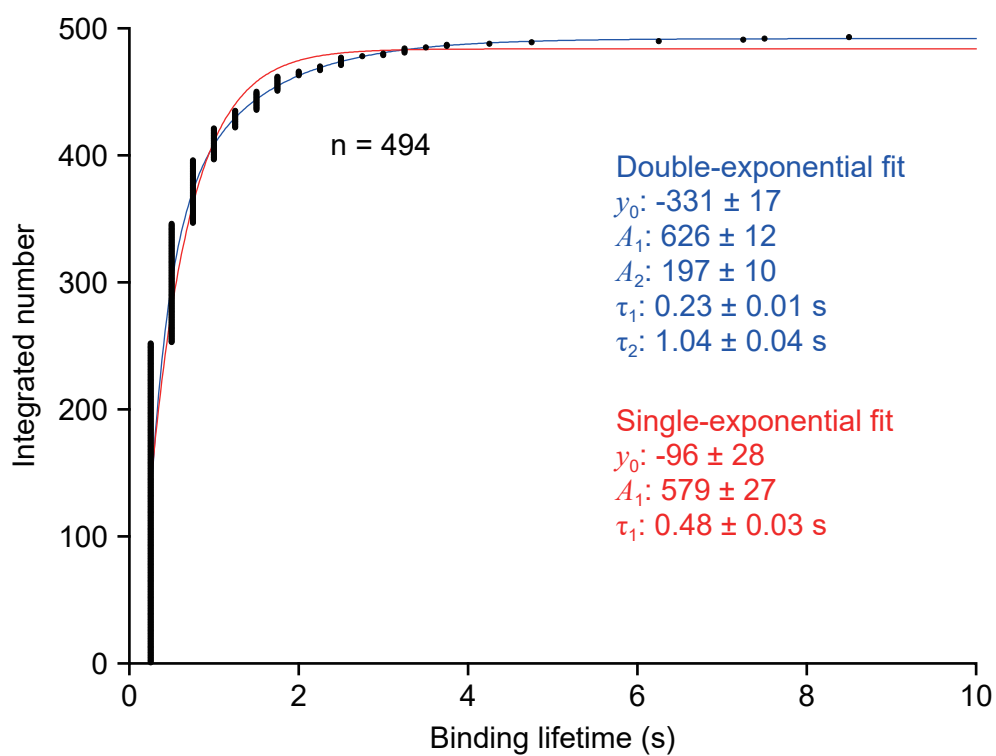

**Supplementary Fig. 16. Integral analysis of the lifetime of non-specific bindings of a Cascade complex to DNA sites.** Blue and red lines are fitted results for double and single exponential, respectively. The double exponential was statistically fitted (*one tailed F-test*,  $P = 1.13 \times 10^{-12}$ ).



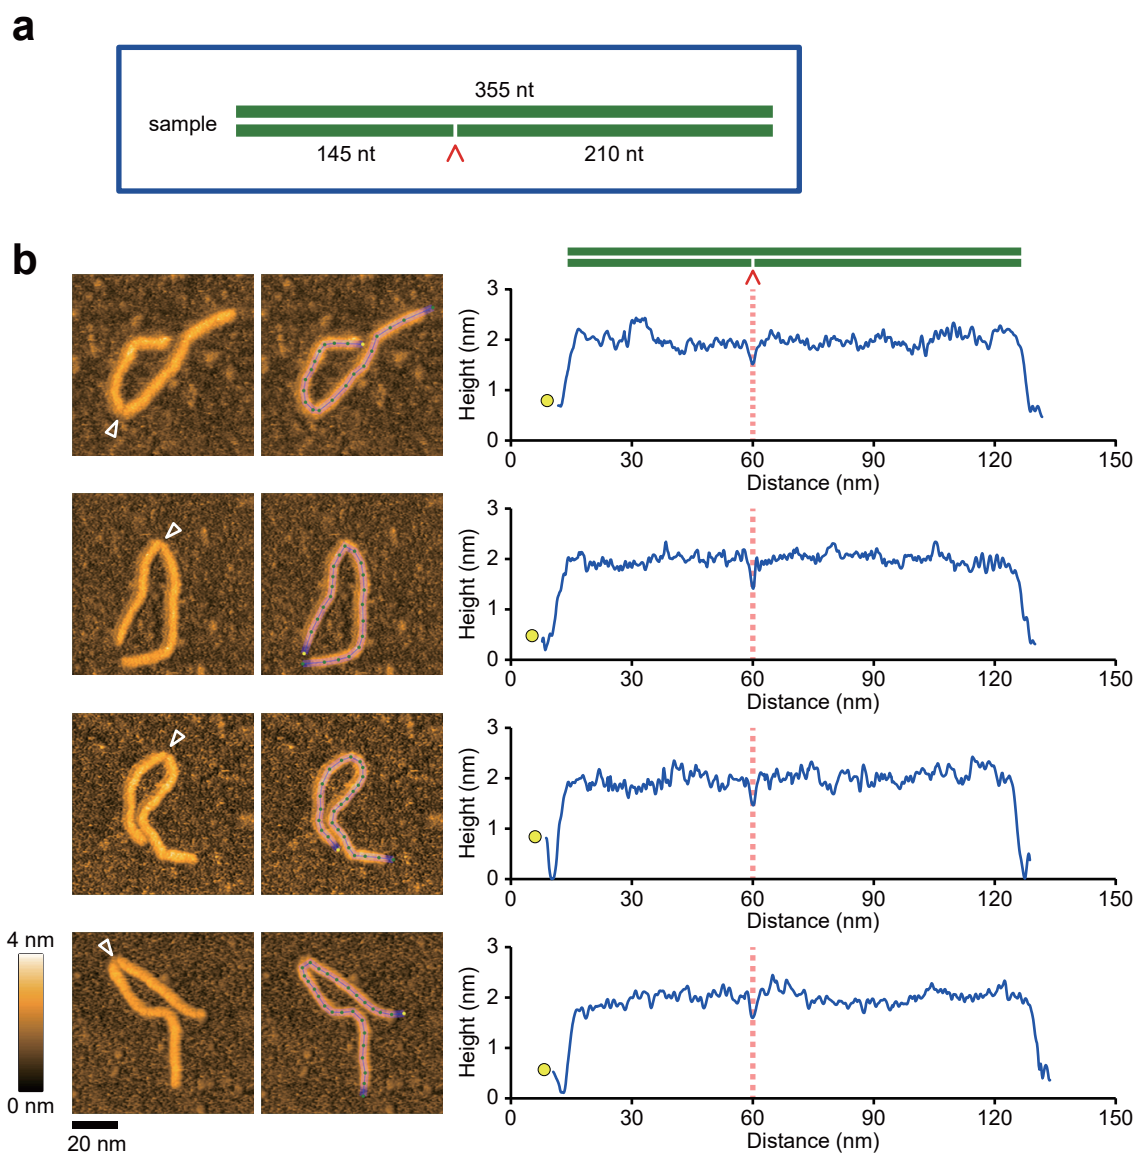

**Supplementary Fig. 17. Visualization and characterization of artificial nicking.**

(a) The diagram of dsDNA which was artificially nicked by Nb.BsrDI endonuclease (red arrowhead). (b) Typical AFM images showing the nicked dsDNA (left and center) and the cross-sections along DNA ridge (right). The white arrowheads in the left images indicate the decreasing height at nicked site. The blue lines in the center images were drawn along the DNA ridges from the yellow dots, along which the cross-sections were measured. The representative images in b were collected from repeated two experiments independently with similar results.

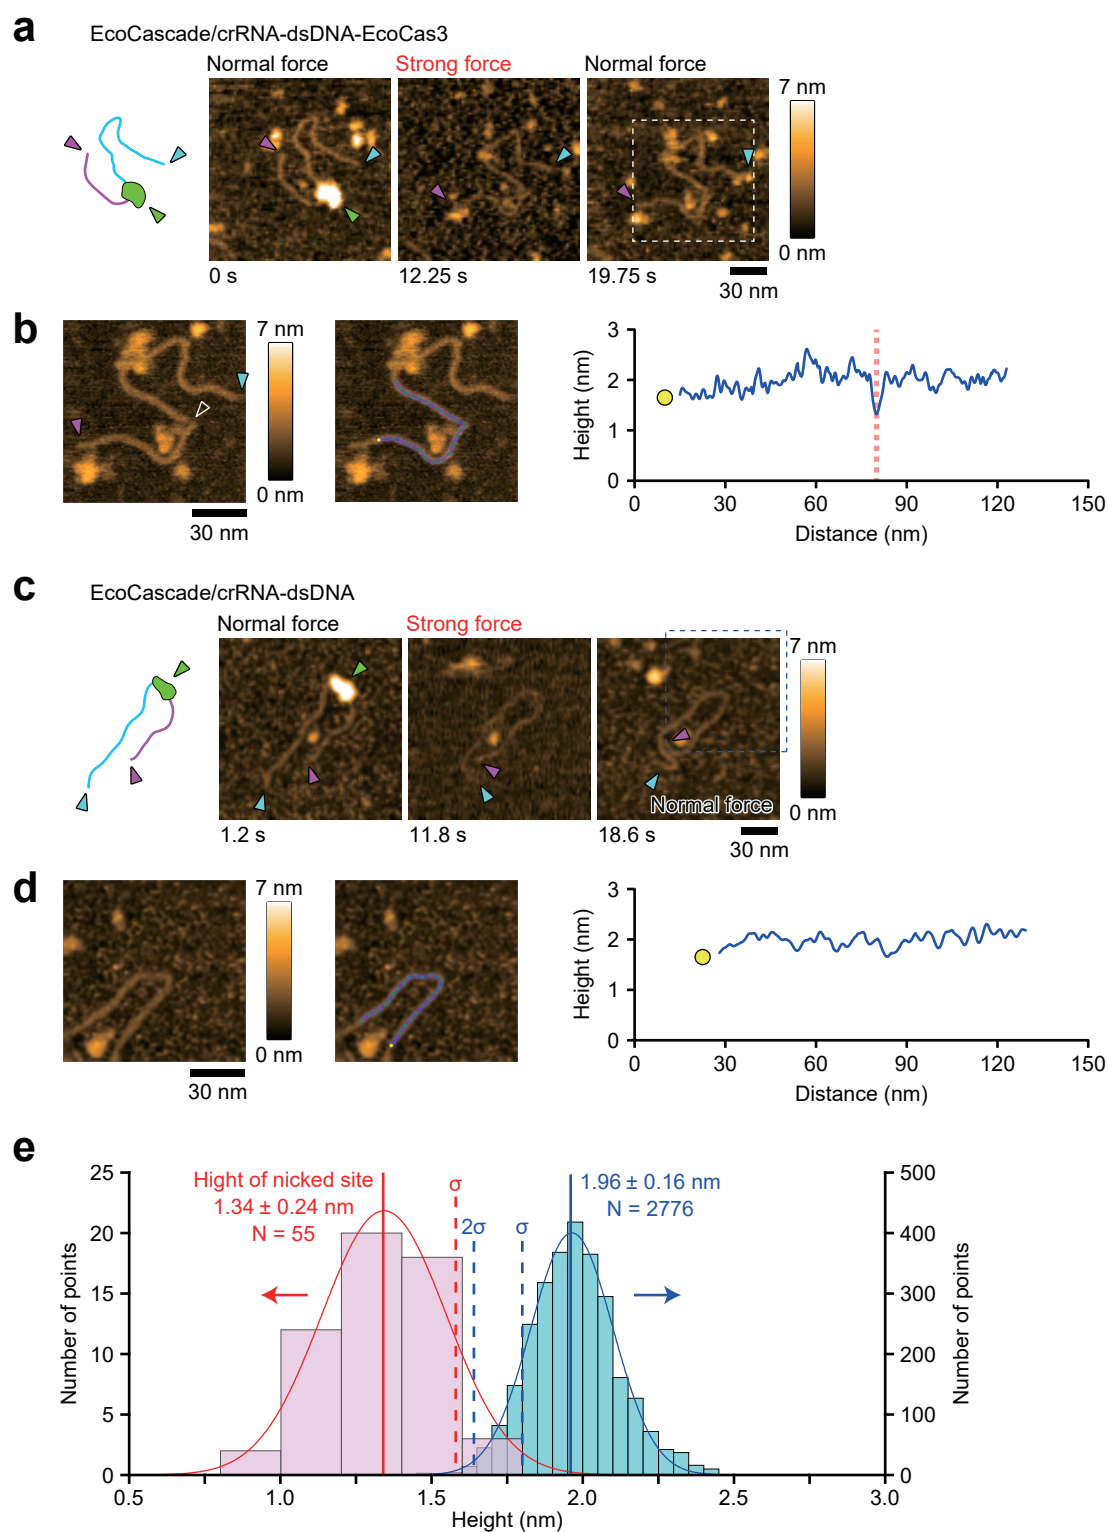

**Supplementary Fig. 18. Characterization of Cas3-mediated nicking at no-ATP condition.** (a) AFM images before and after removal of EcoCas3-EcoCascade-dsDNA by strong tapping force in the absence of ATP. Scan area:  $150 \times 150$  nm<sup>2</sup> with  $80 \times 80$  pixels; frame time: 0.25 s (line rate: 320 Hz). (b) Enlarged image of white dashed line in (a) and height measurement of the dsDNA. Scan area:  $100 \times 100$  nm<sup>2</sup> with  $200 \times 200$  pixels; frame time: 0.33 s (line rate: 606 Hz). Nick position: red dashed line. (c) AFM images before and after removal of EcoCascade-dsDNA by strong tapping force. Scan area:  $150 \times 150$  nm<sup>2</sup> with  $80 \times 80$  pixels; frame time: 0.2 s (line rate: 400 Hz). (d) Enlarged image of blue dashed line in (c) and height measurement of the dsDNA. Scan area:  $100 \times 100$  nm<sup>2</sup> with  $80 \times 80$  pixels; frame time: 0.2 s (line rate: 400 Hz). (b, d) The cross-section (right graph) was measured along the blue line drawn in the second image from left. The representative images in a-d were collected from repeated two experiments independently with similar results. (e) Distribution of measured DNA heights of the nicked (n=55) and another sites (n=2776). The mean heights and standard deviations ( $\sigma$ ) are shown in the graph.

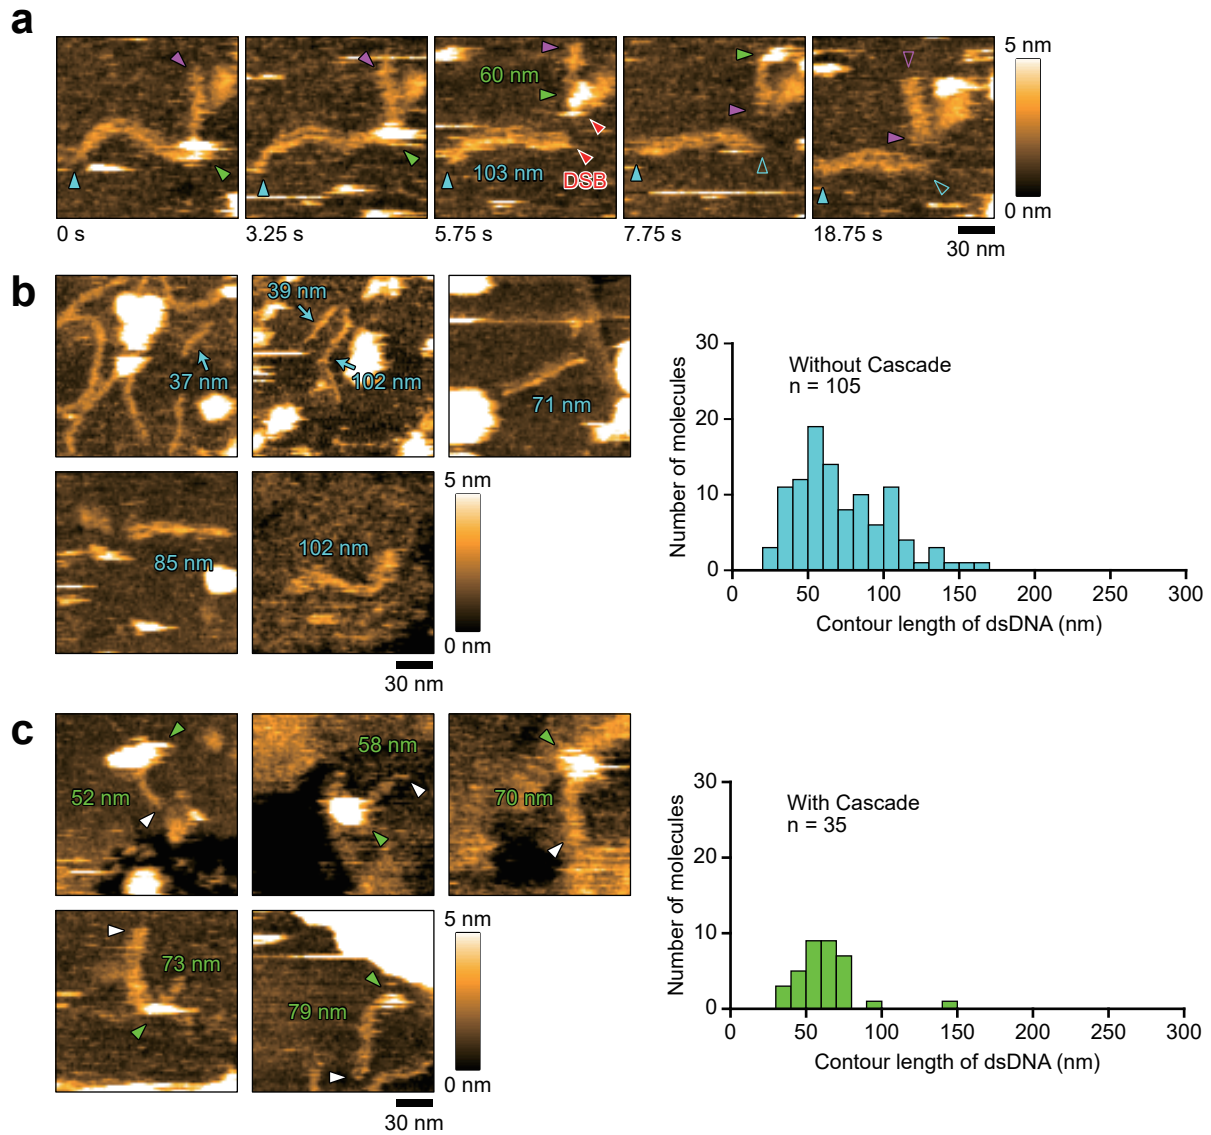

**Supplementary Fig. 19. DNA length observed after adding Cas3 and ATP.** (a) Typical images of a double strand break (DSB) by CRISPR-Cas3. The DSB was observed at 5.75 sec. A protein complex remained on the short DNA at 7.75 sec, but was dissociated at 18.75 sec. Scan area:  $150 \times 150 \text{ nm}^2$  with  $80 \times 80$  pixels; frame time: 0.25 s (line rate: 320 Hz). (b) A typical AFM image of the fragmented DNA without proteins and a histogram of the DNA length observed after Cas3 reaction with ATP. (c) A typical image of the fragmented DNA with proteins and a histogram of the DNA length observed after Cas3 reaction with ATP. The experiment was repeated twice independently with similar results and collected individual data for quantification from both experiments.

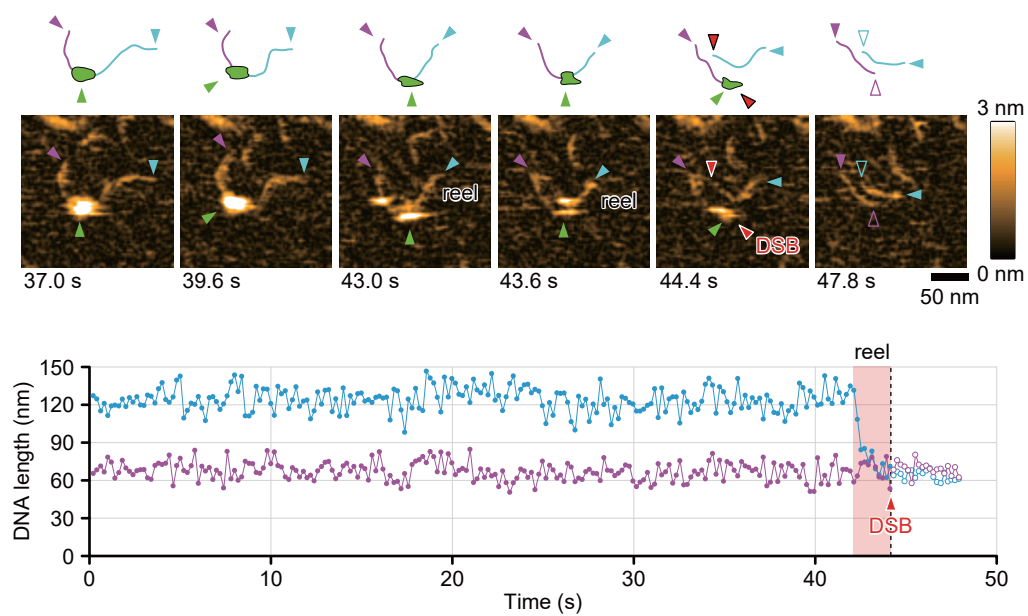

**Supplementary Fig. 20. Dynamic visualization of CRISPR interference by hs-AFM.**

In ATP (+) reaction buffer, the EcoCas3-Cascade complex repeatedly reels and releases the longer side of the DNA (blue arrows) and then cleaves it with a DSB (red arrows) (video 5). Scan area:  $150 \times 150 \text{ nm}^2$  with  $80 \times 80$  pixels; frame time: 0.2 s (line rate: 400 Hz). This similar data were collected from an independently replicated experiment in Figure 5b.

**Supplementary Table 1. Binding kinetics between EcoCascade and ligands.**

|                                 | Response unit   | Rmax   | $k_{on}$ (1/Ms) | $k_{dis}$ (1/s) | KD (M)   | $\chi^2$ | R <sup>2</sup> |          |
|---------------------------------|-----------------|--------|-----------------|-----------------|----------|----------|----------------|----------|
| <b>Supplementary Figure 14a</b> |                 |        |                 |                 |          |          |                |          |
| 2                               | ssTTC           | 0.8909 | 1.0763          | 3.08E+05        | 4.84E-04 | 1.57E-09 | 0.021167       | 0.9991   |
| 4                               | ssGGT           | 0.3319 | 0.4261          | 2.53E+05        | 2.96E-04 | 1.17E-09 | 0.004821       | 0.998807 |
| 6                               | dsPAM(-)TS      | 0.4566 | 0.4334          | 5.27E+05        | 3.60E-04 | 6.83E-10 | 0.020497       | 0.996236 |
| <b>Supplementary Figure 14b</b> |                 |        |                 |                 |          |          |                |          |
| 1                               | dsAAG/TCC       | 0.6917 | 0.8122          | 2.94E+05        | 1.88E-04 | 6.40E-10 | 0.002915       | 0.999833 |
| 2                               | dsCCA/TCC       | 0.3324 | 0.3469          | 3.86E+05        | 1.90E-04 | 4.93E-10 | 0.002682       | 0.999266 |
| 3                               | dsPAM(-)/TTC    | 0.2587 | 0.2976          | 3.04E+05        | 1.67E-04 | 5.50E-10 | 0.001006       | 0.999572 |
| 4                               | dsAAG/GGT       | 0.0902 | 0.1259          | 2.42E+05        | 5.83E-04 | 2.41E-09 | 0.002105       | 0.990738 |
| 5                               | dsCCA/GGT       | 0.116  | 0.1377          | 3.11E+05        | 3.42E-04 | 1.10E-09 | 0.00186        | 0.99575  |
| 6                               | dsPAM(-)/GGT    | 0.2026 | 0.1828          | 5.57E+05        | 1.75E-04 | 3.14E-10 | 0.008907       | 0.991191 |
| 7                               | dsPAM(-)/PAM(-) | 0.2344 | 0.2585          | 3.53E+05        | 4.83E-04 | 1.37E-09 | 0.002376       | 0.998416 |
| <b>Figure 3e</b>                |                 |        |                 |                 |          |          |                |          |
| n0                              |                 | 0.0132 | n.c.            | n.c.            | n.c.     | n.c.     | n.c.           | n.c.     |
| n6                              |                 | 0.0857 | 0.0929          | 2.15E+06        | 1.07E-02 | 4.99E-09 | 0.00041        | 0.995655 |
| n12                             |                 | 0.1117 | 0.1096          | 1.10E+06        | 2.71E-03 | 2.47E-09 | 0.000333       | 0.993216 |
| n18                             |                 | 0.3791 | 0.3619          | 6.41E+05        | 6.96E-04 | 1.09E-09 | 0.00034        | 0.999753 |
| n24                             |                 | 0.4115 | 0.3558          | 8.43E+05        | 8.19E-04 | 9.72E-10 | 0.001636       | 0.998749 |
| n30                             |                 | 0.3699 | 0.3453          | 7.31E+05        | 6.92E-04 | 9.47E-10 | 0.000465       | 0.999709 |
| n32                             |                 | 0.6482 | 0.4785          | 6.21E+05        | 2.21E-04 | 3.56E-10 | 0.002651       | 0.99965  |

$k_{on}$  ( $M^{-1}s^{-1}$ ) showing a binding rate constant, respectively. n.c. mean Not Calculated.

**Supplementary Table 2. Target sequences for Type 1-E CRISPR, CRISPR-Cas12a and CRISPR-Cas9**

| Name            | PAM (5' to 3') | Sequence (5' to 3')              |
|-----------------|----------------|----------------------------------|
| Eco CRISPR-Cas3 |                |                                  |
| EMX1-AAG        | AAG            | CAGGCCAATGGGGAGGACATCGATGTCACCTC |
| mTyr-AAG        | AAG            | GGACACACTGCTTGGGGGCTCTGAAATATGGA |
| rII2rg-AAG      | AAG            | ATATCCAGCTCTACCAGACATTTGTTGTCCAG |
| LbaCas12a       |                |                                  |
| EMX1-TTTG       | TTTG           | TGGTTGCCACCCTAGTCATT             |
| Tyr-TTTG        | TTTG           | TATGGATGCATTACTATGTGT            |
| SpCas9          |                |                                  |
| EMX1            | CCA            | ATGGGGAGGACATCGATGTC             |

**Supplementary Table 3. Primers used for cloning and genotyping.**

| Name                   | Sequence (5' to 3')                         | Note                                                               |
|------------------------|---------------------------------------------|--------------------------------------------------------------------|
| GAPDH Exon Location2-3 | 5HEX/AAGGTCGGA/ZEN/GTCAACGGATTTGGTC/3IABkFQ | assay                                                              |
| EMX1-400bp-F           | CTTTGCTGGGGCTAGAGGAG                        | Preparation of donor DNAs for AFM                                  |
| EMX1-small-R1          | GAGGAGAAGGCCAAGTGGTC                        |                                                                    |
| EMX1-FA-FAM-500bp-F    | FAM/CCATCAGGCTCTCAGCTCAG                    | Preparation of donor DNAs for fragment analysis                    |
| EMX1-FA-TAMRA-500bp-R  | TAMRA/GAGGAGAAGGCCAAGTGGTC                  |                                                                    |
| Tyr-FA-FAM-600bp-F     | FAM/TGGACCTCAGTTCCCCTTCA                    |                                                                    |
| Tyr-FA-TAMRA-600bp-R   | TAMRA/GGTGACGACCTCCCAAGTAC                  |                                                                    |
| mTyr-F1                | AGAACTTGTTGGCAAAGAATGCTG                    | Preparation of donor DNAs for electrophoretic mobility shift assay |
| mTyr-R1                | TGAAAATGTGGCTGCTGAAG                        |                                                                    |
| rIl2rg-ex3-F1          | GGGCAGATGTGGTACCTACC                        |                                                                    |
| rIl2rg-ex3-R1          | TCTGCTTTTCCACCTCAGTTCT                      |                                                                    |
